# Supplementary material
Source: PubMed Central journal article supplement (PMC11240235)
Supplement: NIHMS2001994-supplement-Supplementary_Material.pdf [file NIHMS2001994-supplement-Supplementary_Material.pdf]

**Supplemental Appendix**

Supplemental Table 1. Transcatheter biopsies (n=9).

| Age       | Diagnosis                                             | Location                 | Size, cm | Success? |
|-----------|-------------------------------------------------------|--------------------------|----------|----------|
| 3 months  | Teratoma                                              | Pericardium              | 4.7      | N        |
| 1 year    | Fibroma                                               | LV wall                  | 5.7      | N        |
| 2.8 years | Epithelioid hemangioendothelioma                      | LA, RA, atrial septum    | 4        | Y        |
| 3.1 years | Eosinophilic infiltrate, necrosis, granulation tissue | LV inflow, LV wall       | 3.1      | Y        |
| 3.4 years | Fibroelastoma                                         | RA                       | 2.3      | Y        |
| 4.5 years | Hemangioma                                            | RV wall, septum, RV apex | 4.9      | Y        |
| 10 years  | Necrotizing granulomatous infiltrate with fibrosis    | RV apex, septum          | 2        | Y        |
| 13 years  | Angiosarcoma                                          | RA, pericardium          | 6.2      | Y        |
| 16 years  | Alveolar rhabdomyosarcoma                             | RA, pericardium, IVC     | 4.9      | Y        |

LV = left ventricle; RV = right ventricle; LA = left atrium; RA = right atrium; IVC = inferior vena cava; N=no; Y=yes. No complication was noted for transcatheter biopsies.

Supplemental Table 2. Malignant tumors (n=29).

| Diagnosis                                               | 1° or 2° tumor | Age at dx  | Treatment                        | Follow-up | Status at follow-up           |
|---------------------------------------------------------|----------------|------------|----------------------------------|-----------|-------------------------------|
| Malignant germ cell tumor                               | Primary        | 44 days    | Chemotherapy, surgical resection | 4.5 years | Alive, asymptomatic           |
| Anaplastic large cell lymphoma                          | Secondary      | 3 years    | Chemotherapy                     | 2 years   | Mild LV dysfunction           |
| Yolk sac tumor                                          | Primary        | 3 years    | Surgical resection               | 6 years   | Alive, asymptomatic           |
| Undifferentiated sarcoma                                | Primary        | 3 years    | Surgical resection               | <1 year   | Deceased                      |
| Wilms tumor                                             | Secondary      | 3 years    | Surgical resection, chemotherapy | N/A       |                               |
| Malignant rhabdoid tumor                                | Primary        | 5 years    | Surgical resection, chemotherapy | 5 years   | Alive, asymptomatic           |
| Pericardial monophasic synovial sarcoma                 | Secondary      | 6 years    | Surgical resection, chemotherapy | 4 years   | Deceased                      |
| Wilms tumor                                             | Secondary      | 7 years    | Surgical resection, chemotherapy | N/A       |                               |
| Synovial sarcoma                                        | Primary        | 8 years    | Surgical resection, chemotherapy | 4 years   | Alive, asymptomatic           |
| Cardiac sarcoma                                         | Primary        | 9 years    | Chemotherapy, resection*         | 7 years   | Alive, asymptomatic           |
| Angiosarcoma                                            | Primary        | 13 years   | Surgical resection               | < 1 year  | Deceased                      |
| High grade leiomyosarcoma with myxoid features          | Primary        | 13.2 years | Surgical resection/debulking     | N/A       |                               |
| Alveolar rhabdomyosarcoma                               | Secondary      | 14 years   | Chemotherapy, radiation          | 4 years   | Deceased                      |
| Synovial sarcoma                                        | Secondary      | 14 years   | Chemotherapy, heart transplant   | 1 year    | Alive, asymptomatic           |
| Low to intermediate grade sarcoma                       | Primary        | 14 years   | Surgical resection               | < 1 year  | No recurrence                 |
| Epithelioid angiosarcoma                                | Primary        | 14 years   | Surgical resection, chemotherapy | N/A       |                               |
| B cell lymphoma                                         | Secondary      | 15 years   | Chemotherapy                     | < 1 year  | Alive, asymptomatic           |
| Rhabdomyosarcoma                                        | Secondary      | 16 years   | Chemotherapy, pericardial drain  | < 1 year  | Deceased                      |
| Immature teratoma, malignant non-germ cell component    | Primary        | 16 years   | Surgical resection, chemotherapy | 1 year    | Deceased                      |
| Unclassified pleomorphic epithelioid malignant neoplasm | Primary        | 16 years   | Chemotherapy, radiation          | N/A       |                               |
| Midline NUT carcinoma                                   | Secondary      | 16.8 years | Chemotherapy                     | < 1 year  | Deceased                      |
| Acute myeloblastic leukemia                             | Secondary      | 17 years   | Chemotherapy                     | < 1 year  | Deceased                      |
| Angiosarcoma                                            | Primary        | 17 years   | Chemotherapy, radiation          | 2 years   | Deceased                      |
| Angiosarcoma                                            | Primary        | 17 years   | Chemotherapy, resection          | 1 year    | Residual problems             |
| Burkitt lymphoma                                        | Secondary      | 17 years   | Chemotherapy                     | N/A       |                               |
| Alveolar soft part sarcoma                              | Secondary      | 17.3 years | Chemotherapy                     | N/A       |                               |
| Undifferentiated sarcoma                                | Secondary      | 17.9 years | Chemotherapy, radiation          | < 1 year  | Pain, side effects from chemo |
| Rhabdomyosarcoma                                        | Secondary      | 18 years   | Pericardial window               | <1 year   | Deceased                      |
| Angiosarcoma                                            | Primary        | 18 years   | Surgical resection, chemotherapy | 2 years   | Deceased                      |

\*Initially the mass was deemed unresectable, but became resectable following chemotherapy.

Supplemental Table 3. Univariate predictors of death by Cox regression (n=164).

| Variable                          | HR   | 95% CI      | p value          |
|-----------------------------------|------|-------------|------------------|
| Age at CMR                        |      |             |                  |
| Low (<0.7 years)                  | Ref  |             | 0.160            |
| Medium (0.7-7.3 years)            | 0.35 | 0.08, 1.63  |                  |
| High (>7.3 years)                 | 0.22 | 0.05, 1.06  |                  |
| Male                              | 0.73 | 0.28, 1.89  | 0.514            |
| Prenatal diagnosis                | 7.50 | 1.84, 30.60 | <b>0.005</b>     |
| History of malignancy             | 2.67 | 1.00, 7.14  | 0.050            |
| Respiratory symptoms              | 1.82 | 0.57, 5.82  | 0.310            |
| Arrhythmia                        | 0.28 | 0.05, 1.54  | 0.142            |
| Murmur                            | 0.26 | 0.01, 4.61  | 0.356            |
| Chest pain                        | 1.87 | 0.65, 5.39  | 0.250            |
| Fever                             | 5.34 | 1.47, 19.40 | <b>0.011</b>     |
| Neurologic symptoms               | 1.13 | 0.20, 6.47  | 0.891            |
| Pericardial effusion              | 5.22 | 2.05, 13.32 | <b>&lt;0.001</b> |
| Pleural effusion                  | 3.40 | 1.28, 9.05  | <b>0.014</b>     |
| Hemodynamic impact                | 8.01 | 2.83, 22.69 | <b>&lt;0.001</b> |
| Multiple                          | 1.59 | 0.56, 4.50  | 0.386            |
| Well circumscribed                | 0.35 | 0.13, 0.94  | <b>0.037</b>     |
| Infiltrative                      | 3.51 | 1.34, 9.18  | <b>0.011</b>     |
| Intramyocardial                   | 0.32 | 0.09, 1.05  | 0.060            |
| Intrapericardial                  | 3.74 | 1.41, 9.94  | <b>0.008</b>     |
| Epicardial                        | 1.29 | 0.43, 3.86  | 0.652            |
| Anterior mediastinal              | 2.05 | 0.51, 8.17  | 0.311            |
| Posterior mediastinal             | 1.31 | 0.23, 7.50  | 0.759            |
| Endocardial                       | 0.70 | 0.21, 2.32  | 0.560            |
| SVC/IVC location                  | 4.25 | 1.39, 13.03 | <b>0.011</b>     |
| Atrium location                   | 1.43 | 0.55, 3.74  | 0.469            |
| Inflow location                   | 1.38 | 0.23, 8.14  | 0.722            |
| Outflow location                  | 0.54 | 0.03, 10.01 | 0.679            |
| LV location                       | 0.56 | 0.19, 1.68  | 0.304            |
| Septum location                   | 0.36 | 0.07, 2.02  | 0.247            |
| RV location                       | 1.73 | 0.57, 5.29  | 0.333            |
| Mass:cardiac length ratio         |      |             | 0.127            |
| Small (<0.34)                     | Ref  |             |                  |
| Medium (0.34-0.57)                | 1.47 | 0.42, 5.23  |                  |
| Large (>0.57)                     | 3.23 | 0.97, 10.73 |                  |
| Cine SSFP tertile                 |      |             | 0.971            |
| Low (<1.1)                        | Ref  |             |                  |
| Medium (1.1-1.6)                  | 0.96 | 0.27, 3.43  |                  |
| High (>1.6)                       | 0.88 | 0.30, 2.58  |                  |
| Pre-gadolinium T1 intensity ratio |      |             | 0.395            |
| Low (<1)                          | Ref  |             |                  |
| Medium (1-1.2)                    | 1.03 | 0.31, 3.37  |                  |
| High (>1.2)                       | 0.50 | 0.15, 1.67  |                  |
| Fat content                       | 0.92 | 0.04, 19.20 | 0.959            |
| T2 intensity ratio                |      |             | 0.452            |
| Low (<1.1)                        | Ref  |             |                  |
| Medium (1.1-1.7)                  | 2.46 | 0.53, 11.37 |                  |
| High (>1.7)                       | 2.47 | 0.56, 10.86 |                  |
| FPP intensity ratio $\geq 1$      | 1.35 | 0.32, 5.60  | 0.683            |
| LGE intensity ratio               |      |             | 0.663            |
| Low (<1.4)                        | Ref  |             |                  |
| Medium (1.4-4.2)                  | 0.84 | 0.23, 3.10  |                  |
| High (>4.2)                       | 0.51 | 0.12, 2.27  |                  |

CMR = cardiovascular magnetic resonance, SVC = superior vena cava, IVC = inferior vena cava, LV = left ventricle, RV = right ventricle, SSFP = steady state free precession, FPP = first pass perfusion, LGE = late gadolinium enhancement.

Supplemental Table 4. Technical characteristics of 213 CMR examinations.

| Variable              | N (%)    |
|-----------------------|----------|
| <b>Scanner</b>        |          |
| GE                    | 42 (20)  |
| Philips               | 81 (38)  |
| Siemens               | 90 (42)  |
| <b>Field strength</b> |          |
| 1.5T                  | 207 (97) |
| 3T                    | 6 (3)    |
| <b>Sedation</b>       |          |
| No sedation           | 70 (33)  |
| General anesthesia    | 123 (58) |
| IV sedation           | 10 (5)   |
| Anxiolysis            | 2 (1)    |
| Unknown               | 8 (4)    |
| <b>Image quality</b>  |          |
| Very good             | 108 (51) |
| Good                  | 84 (39)  |
| Fair                  | 20 (9)   |
| Poor                  | 1 (<1)   |
| <b>Sequences</b>      |          |
| Cine SSFP             | 211 (99) |
| T1 TSE                | 179 (84) |
| T2 TSE                | 170 (80) |
| Fat content imaging   | 165 (77) |
| First pass perfusion  | 150 (70) |
| LGE                   | 166 (78) |

GE = General Electric; IV = intravenous; SSFP = steady state free precession; TSE = turbo spin echo; LGE = late gadolinium enhancement.

Supplemental Table 5. Patient and mass characteristics. Median (IQR) and frequency (%).

| Mass type                            | All<br>(N=213)* | Fibroma<br>(N=73) | Rhabdomyoma<br>(N=32) | Malignant<br>(N = 29) | Myxoma<br>(N=15) | Teratoma<br>(N=9) | Hemangioma<br>(N=6) |
|--------------------------------------|-----------------|-------------------|-----------------------|-----------------------|------------------|-------------------|---------------------|
| Age at CMR (years)                   | 3 (0.4, 12)     | 0.7 (0.3, 5.4)    | 0.3 (0, 1.5)          | 14 (8, 17)            | 13 (8, 15)       | 0.04 (0, 0.2)     | 9.5 (4.5, 14)       |
| Prenatal diagnosis                   | 38 (18)         | 15 (38)           | 18 (56)               | 0                     | 0                | 4 (44)            | 1 (17)              |
| Male sex                             | 110 (52)        | 37 (51)           | 14 (44)               | 14 (48)               | 5 (33)           | 4 (44)            | 5 (83)              |
| Genetic diagnosis                    | 51 (24)         | 11 (15)           | 27 (84)               | 0                     | 4 (27)           | 0                 | 0                   |
| History of malignancy                | 16 (8)          | 1 (1)             | 0                     | 13 (43)               | 1 (7)            | 0                 | 0                   |
| <b>Presenting symptoms†</b>          |                 |                   |                       |                       |                  |                   |                     |
| Respiratory                          | 41 (19)         | 15 (21)           | 3 (9)                 | 8 (28)                | 1 (7)            | 5 (56)            | 0                   |
| Arrhythmia                           | 41 (19)         | 26 (36)           | 5 (16)                | 2 (7)                 | 1 (7)            | 0                 | 0                   |
| Murmur                               | 31 (15)         | 15 (21)           | 3 (9)                 | 1 (3)                 | 3 (20)           | 0                 | 1 (17)              |
| Chest pain                           | 17 (8)          | 3 (4)             | 0                     | 8 (28)                | 1 (7)            | 0                 | 0                   |
| Fever                                | 13 (6)          | 0                 | 0                     | 4 (14)                | 1 (7)            | 0                 | 0                   |
| Neurologic                           | 13 (6)          | 2 (3)             | 3 (9)                 | 2 (7)                 | 2 (13)           | 0                 | 0                   |
| Fatigue                              | 8 (4)           | 1 (1)             | 0                     | 3 (10)                | 0                | 0                 | 2 (33)              |
| <b>Gross characteristics</b>         |                 |                   |                       |                       |                  |                   |                     |
| Largest dimension (cm)               | 4 (2.2, 5.3)    | 5 (3.5, 5.8)      | 2.6 (1.9, 3.6)        | 5 (4.1, 7)            | 1.6 (0.9, 4.1)   | 4.7 (4.1, 5)      | 1.8 (1.6, 2.4)      |
| Mass-to-cardiac length ratio         | 0.44 (0.3, 0.6) | 0.6 (0.4, 0.8)    | 0.4 (0.3, 0.5)        | 0.5 (0.3, 0.6)        | 0.1 (0.1, 0.3)   | 1 (0.8, 1)        | 0.1 (0.1, 0.3)      |
| Multiple masses                      | 29 (14)         | 4 (5)             | 9 (28)                | 9 (31)                | 1 (7)            | 0 (0)             | 0 (0)               |
| Well-circumscribed                   | 178 (84)        | 73 (100)          | 31 (97)               | 11 (38)               | 10 (67)          | 9 (100)           | 5 (83)              |
| Infiltrative appearance              | 37 (17)         | 0                 | 1 (3)                 | 21 (72)               | 0                | 1 (11)            | 1 (17)              |
| Pericardial effusion                 | 52 (24)         | 23 (32)           | 4 (13)                | 9 (31)                | 1 (7)            | 7 (78)            | 0 (0)               |
| Pleural effusion                     | 19 (9)          | 2 (3)             | 0 (0)                 | 10 (34)               | 0 (0)            | 3 (33)            | 0 (0)               |
| Hemodynamic impact                   | 79 (37)         | 23 (31)           | 12 (38)               | 13 (45)               | 4 (27)           | 9 (100)           | 1 (17)              |
| <b>Location</b>                      |                 |                   |                       |                       |                  |                   |                     |
| SVC/IVC                              | 11 (5)          | 0                 | 0                     | 5 (17)                | 0                | 0                 | 1 (17)              |
| RA/LA/Atrial septum                  | 56 (26)         | 4 (5)             | 6 (19)                | 17 (59)               | 7 (47)           | 2 (22)            | 2 (33)              |
| Inflow/MV/TV                         | 19 (9)          | 1 (1)             | 3 (9)                 | 4 (14)                | 2 (13)           | 0                 | 2 (33)              |
| Outflow/AoV                          | 18 (8)          | 2 (3)             | 6 (19)                | 1 (3)                 | 1 (7)            | 0                 | 1 (17)              |
| Left ventricle                       | 78 (36)         | 44 (60)           | 14 (44)               | 5 (17)                | 3 (20)           | 0                 | 0                   |
| Septum/Crux                          | 44 (21)         | 24 (33)           | 9 (28)                | 2 (7)                 | 1 (7)            | 1 (11)            | 1 (17)              |
| Right ventricle                      | 44 (21)         | 14 (19)           | 10 (31)               | 8 (28)                | 0                | 1 (11)            | 3 (50)              |
| Intramyocardial                      | 108 (51)        | 70 (96)           | 20 (63)               | 5 (17)                | 0                | 1 (11)            | 1 (17)              |
| Epicardial                           | 27 (13)         | 1 (1)             | 8 (25)                | 10 (34)               | 0                | 1 (11)            | 0                   |
| Endocardial                          | 51 (24)         | 3 (4)             | 7 (22)                | 5 (17)                | 15 (100)         | 0                 | 4 (67)              |
| Intrapericardial                     | 22 (10)         | 0                 | 1 (3)                 | 9 (31)                | 0                | 8 (89)            | 0                   |
| Anterior mediastinal                 | 8 (4)           | 0                 | 0                     | 7 (24)                | 0                | 0                 | 0                   |
| Posterior mediastinal                | 7 (3)           | 0                 | 0                     | 3 (10)                | 0                | 0                 | 0                   |
| <b>Tissue characteristics</b>        |                 |                   |                       |                       |                  |                   |                     |
| Cine intensity ratio                 | 1.3 (1, 1.9)    | 1.1 (0.9, 1.3)    | 1.2 (1, 1.4)          | 1.6 (1.2, 2)          | 2.3 (2, 2.8)     | 2.8 (2.6, 3.3)    | 2 (1.6, 2.2)        |
| Pre-Gd T1 imaging intensity ratio    | 1.1 (0.9, 1.3)  | 1 (0.9, 1.1)      | 1.1 (0.9, 1.2)        | 1.2 (1, 1.4)          | 1.2 (0.9, 1.3)   | 1 (0.6, 1)        | 1.1 (1, 1.3)        |
| T2 imaging intensity ratio           | 1.5 (1, 2)      | 1.3 (0.9, 1.5)    | 1.2 (1.1, 1.7)        | 1.9 (1.5, 2.4)        | 1.9 (1.4, 2.5)   | 2.1 (1.3, 3.1)    | 2.6 (2.3, 3.3)      |
| Evidence of fat content              | 9/165 (5)       | 0/59 (0)          | 1/22 (5)              | 1/22 (5)              | 0/10 (0)         | 0/7 (0)           | 0/6 (0)             |
| First pass perfusion intensity ratio | 0.4 (0.3, 0.6)  | 0.4 (0.3, 0.5)    | 0.6 (0.5, 0.7)        | 0.5 (0.4, 0.6)        | 0.4 (0.3, 0.6)   | 0.3 (0.2, 0.3)    | 1.8 (1.6, 2)        |
| LGE intensity ratio                  | 2.8 (1.1, 6.5)  | 4.5 (2.8, 12.2)   | 1 (0.4, 1.1)          | 2 (1.1, 4.9)          | 1.4 (1, 5.3)     | 1 (0.7, 1.9)      | 8.4 (3.9, 11.3)     |
| Fibroma LGE pattern                  | 66/166 (40)     | 52/60 (87)        | 0/21 (0)              | 5/23 (22)             | 2/13 (15)        | 0/4 (0)           | 0/6 (0)             |

| Mass type                            | Fatty Deposits<br>in TSC<br>(N=7) | Angiosarcoma‡<br>(N=5) | Thrombus<br>(N=5) | Infectious/<br>Inflammatory<br>(N=5) | Papillary<br>fibroelastoma<br>(N=3) | Benign<br>myofibroblastic mass<br>(N=5) | IMT<br>(N=4)    |
|--------------------------------------|-----------------------------------|------------------------|-------------------|--------------------------------------|-------------------------------------|-----------------------------------------|-----------------|
| Age at CMR (years)                   | 12 (7, 15)                        | 17 (14, 17)            | 1.5 (0.9, 3.7)    | 3.1 (1.5, 10)                        | 11 (3.1, 14)                        | 3.4 (0.8, 3.5)                          | 14 (7, 15)      |
| Prenatal diagnosis                   | 0                                 | 0                      | 0                 | 0                                    | 0                                   | 0                                       | 0               |
| Male sex                             | 6 (86)                            | 1 (20)                 | 4 (80)            | 3                                    | 2 (67)                              | 3 (60)                                  | 3 (75)          |
| Genetic diagnosis                    | 7 (100)                           | 0                      | 0                 | 0                                    | 0                                   | 0                                       | 0               |
| History of malignancy                | 0                                 | 1 (20)                 | 0                 | 0                                    | 0                                   | 1 (20)                                  | 0               |
| <b>Presenting symptoms†</b>          |                                   |                        |                   |                                      |                                     |                                         |                 |
| Respiratory                          | 0                                 | 0                      | 2 (40)            | 0                                    | 0                                   | 0                                       | 1 (25)          |
| Arrhythmia                           | 1 (14)                            | 0                      | 1 (20)            | 1 (20)                               | 0                                   | 0                                       | 1 (25)          |
| Murmur                               | 0                                 | 0                      | 2 (40)            | 0                                    | 1 (33)                              | 1 (20)                                  | 2 (50)          |
| Chest pain                           | 1 (14)                            | 3 (60)                 | 1 (20)            | 0                                    | 0                                   | 0                                       | 0               |
| Fever                                | 0                                 | 0                      | 1 (20)            | 1 (20)                               | 1 (33)                              | 0                                       | 1 (25)          |
| Neurologic                           | 1 (14)                            | 1 (20)                 | 0                 | 0                                    | 0                                   | 0                                       | 1 (25)          |
| Fatigue                              | 0                                 | 1 (20)                 | 0                 | 0                                    | 0                                   | 0                                       | 1 (25)          |
| <b>Gross characteristics</b>         |                                   |                        |                   |                                      |                                     |                                         |                 |
| Largest dimension (cm)               | 0.8 (0.5, 4.1)                    | 6.2 (6.2, 8.9)         | 1.9 (1.1, 2.2)    | 2 (1.4, 3.1)                         | 1 (0.6, 1.3)                        | 1.9 (1.3, 2.3)                          | 3.9 (0.3, 6.6)  |
| Mass-to-cardiac length ratio         | 0.1 (0.04, 0.3)                   | 0.5 (0.5, 0.6)         | 0.2 (0.1, 0.3)    | 0.2 (0.2, 0.4)                       | 0.1 (0.1, 0.1)                      | 0.3 (0.2, 0.3)                          | 0.3 (<0.1, 0.5) |
| Multiple masses                      | 3 (43)                            | 2 (40)                 | 1 (20)            | 0                                    | 0                                   | 0                                       | 0               |
| Well-circumscribed                   | 6 (86)                            | 2 (40)                 | 5 (100)           | 3 (60)                               | 3 (100)                             | 5 (100)                                 | 2 (50)          |
| Infiltrative                         | 0                                 | 5 (100)                | 0                 | 2 (40)                               | 0                                   | 2 (40)                                  | 2 (50)          |
| Pericardial effusion                 | 0 (0)                             | 2 (40)                 | 0 (0)             | 1 (20)                               | 0                                   | 2 (40)                                  | 0               |
| Pleural effusion                     | 0 (0)                             | 3 (60)                 | 1 (20)            | 1 (20)                               | 0                                   | 0                                       | 0               |
| Hemodynamic impact                   | 0 (0)                             | 4 (80)                 | 1 (20)            | 1 (20)                               | 1 (33)                              | 3 (60)                                  | 3 (75)          |
| <b>Location</b>                      |                                   |                        |                   |                                      |                                     |                                         |                 |
| SVC/IVC                              | 0                                 | 1 (20)                 | 2 (40)            | 1                                    | 0                                   | 0                                       | 0               |
| RA/LA/Atrial septum                  | 1 (14)                            | 5 (100)                | 3 (60)            | 1                                    | 0                                   | 2 (40)                                  | 1 (25)          |
| Inflow/MV/TV                         | 0                                 | 0                      | 0                 | 2                                    | 2 (67)                              | 1 (20)                                  | 2 (50)          |
| Outflow/AoV                          | 0                                 | 0                      | 0                 | 0                                    | 1 (33)                              | 3 (60)                                  | 1 (25)          |
| Left ventricle                       | 5 (71)                            | 0                      | 0                 | 2                                    | 0                                   | 1 (20)                                  | 1 (25)          |
| Septum/Crux                          | 4 (57)                            | 0                      | 0                 | 1                                    | 0                                   | 0                                       | 0               |
| Right ventricle                      | 1 (14)                            | 1 (20)                 | 0                 | 1                                    | 0                                   | 0                                       | 1 (25)          |
| Intramyocardial                      | 4 (57)                            | 0                      | 0                 | 1 (20)                               | 0                                   | 1 (20)                                  | 1 (25)          |
| Epicardial                           | 4 (57)                            | 0                      | 0                 | 0                                    | 0                                   | 0                                       | 0               |
| Endocardial                          | 0                                 | 1 (20)                 | 5 (100)           | 2 (40)                               | 3 (100)                             | 2 (40)                                  | 3 (75)          |
| Intrapericardial                     | 0                                 | 1 (20)                 | 0                 | 0                                    | 0                                   | 0                                       | 0               |
| Anterior mediastinal                 | 0                                 | 1 (20)                 | 0                 | 0                                    | 0                                   | 0                                       | 0               |
| Posterior mediastinal                | 0                                 | 0                      | 0                 | 0                                    | 0                                   | 0                                       | 0               |
| <b>Tissue characteristics</b>        |                                   |                        |                   |                                      |                                     |                                         |                 |
| Cine intensity ratio                 | 0.9 (0.7, 3.5)                    | 1.7 (1.6, 2.1)         | 1.1 (1, 2.1)      | 1.5 (1.1, 1.9)                       | 1.3 (1.2, 3.6)                      | 1.6 (1, 1.6)                            | 1.5 (1.2, 3)    |
| Pre-Gd T1 imaging intensity ratio    | 1.9 (1.6, 2.3)                    | 1.4 (1.1, 3)           | 1 (0.9, 1.1)      | 0.8 (0.7, 1)                         | 1 (0.9, 1)                          | 1.2 (1, 1.2)                            | 1.6 (0.9, 1.7)  |
| T2 imaging intensity ratio           | 0.7 (0.7, 1.6)                    | 2.1 (1.7, 2.3)         | 1 (0.8, 1.3)      | 1.4 (1.3, 2)                         | 1 (0.9, 3.1)                        | 1.9 (1.7, 2)                            | 1.4 (0.7, 1.9)  |
| Evidence of fat content              | 7/7 (100)                         | 0/4 (0)                | 0/3 (0)           | 0/3 (0)                              | 0/2 (0)                             | 0/2 (0)                                 | 0/3 (0)         |
| First pass perfusion intensity ratio | 0.8 (0.3, 0.9)                    | 1 (0.7, 1.2)           | 0.3 (0.2, 0.8)    | 0.5 (0.4, 0.5)                       | 0.7 (0.4, 1.3)                      | 0.3 (0.3, 0.4)                          | 0.5 (0.3, 0.6)  |
| LGE intensity ratio                  | 3 (2.2, 4.8)                      | 2.6 (2.4, 3.1)         | 1.1 (0.3, 1.3)    | 4.8 (1.5, 8.7)                       | 1.5 (1.3, 1.8)                      | 0.6 (0.5, 2.4)                          | 2.4 (1, 14)     |
| Fibroma LGE pattern                  | 0/4 (0)                           | 2/5 (40)               | 0/3 (0)           | 1/3 (33)                             | 1/2 (50)                            | 2/5 (40)                                | 1/3 (33)        |

| Mass type                            | Cyst§<br>(N=4) | Rosai Dorfman<br>disease<br>(N=3) | Hemangioendothelioma<br>(N=3) | Neurofibroma<br>(N=2) | Paranglioma<br>(N=2) | Lymphatic<br>malformation<br>(N=2) | Other vascular<br>malformation<br>(N = 2) |
|--------------------------------------|----------------|-----------------------------------|-------------------------------|-----------------------|----------------------|------------------------------------|-------------------------------------------|
| Age at CMR (years)                   | 2.8 (1.9, 6)   | 12 (3, 13.4)                      | 2.8 (0.4, 16)                 | 9.6 (3.3, 16)         | 17.3 (16.5, 18)      | 9.4 (6.8, 12)                      | 5.2 (3.7, 6.7)                            |
| Prenatal diagnosis                   | 0              | 0                                 | 0                             | 0                     | 0                    | 0                                  | 0                                         |
| Male sex                             | 3 (75)         | 1 (33)                            | 2 (67)                        | 1 (50)                | 1 (50)               | 0 (0)                              | 2 (100)                                   |
| Genetic diagnosis                    | 0              | 0                                 | 0                             | 2                     | 0                    | 0                                  | 0                                         |
| History of malignancy                | 0              | 0                                 | 0                             | 0                     | 0                    | 0                                  | 0                                         |
| <b>Presenting symptoms†</b>          |                |                                   |                               |                       |                      |                                    |                                           |
| Respiratory                          | 2 (50)         | 0                                 | 1 (33)                        | 1 (50)                | 0                    | 1 (50)                             | 1 (50)                                    |
| Arrhythmia                           | 1 (25)         | 0                                 | 0                             | 0                     | 2 (100)              | 0                                  | 0                                         |
| Murmur                               | 1 (25)         | 1 (33)                            | 0                             | 0                     | 0                    | 0                                  | 0                                         |
| Chest pain                           | 0              | 2 (67)                            | 0                             | 0                     | 0                    | 1 (50)                             | 0                                         |
| Fever                                | 1 (25)         | 0                                 | 1 (33)                        | 0                     | 0                    | 1 (50)                             | 1 (50)                                    |
| Neurologic                           | 0              | 1 (33)                            | 0                             | 0                     | 0                    | 0                                  | 0                                         |
| Fatigue                              | 0              | 0                                 | 1 (33)                        | 0                     | 0                    | 0                                  | 0                                         |
| <b>Gross characteristics</b>         |                |                                   |                               |                       |                      |                                    |                                           |
| Largest dimension (cm)               | 3.9 (2.3, 4.9) | 2.9 (2.8, 5.1)                    | 4 (3.7, 6.1)                  | 6.5 (4.9, 8)          | 3.5 (3.4, 3.6)       | 6 (4.9, 7)                         | 5.9 (5.5, 6.3)                            |
| Mass-to-cardiac length ratio         | 0.5 (0.4, 0.5) | 0.3 (0.3, 0.4)                    | 0.4 (0.4, 0.6)                | 0.6 (0.6, 0.7)        | 0.2 (0.2, 0.3)       | 0.5 (0.5, 0.5)                     | 0.6 (0.5, 0.6)                            |
| Multiple masses                      | 0              | 1 (33)                            | 0                             | 2 (100)               | 0                    | 0                                  | 0                                         |
| Well-circumscribed                   | 4 (100)        | 2 (67)                            | 3 (100)                       | 0                     | 2 (100)              | 1 (50)                             | 1 (50)                                    |
| Infiltrative                         | 0              | 1 (33)                            | 3 (100)                       | 1 (50)                | 0                    | 1 (50)                             | 0                                         |
| Pericardial effusion                 | 1 (25)         | 1 (33)                            | 0                             | 1 (50)                | 0                    | 1 (50)                             | 0                                         |
| Pleural effusion                     | 1 (25)         | 0                                 | 0                             | 0                     | 0                    | 1 (50)                             | 0                                         |
| Hemodynamic impact                   | 2 (50)         | 1 (33)                            | 2 (67)                        | 0                     | 0                    | 1 (50)                             | 0                                         |
| <b>Location</b>                      |                |                                   |                               |                       |                      |                                    |                                           |
| SVC/IVC                              | 1 (25)         | 0                                 | 0                             | 0                     | 0                    | 0                                  | 0                                         |
| RA/LA/Atrial septum                  | 1 (25)         | 2 (67)                            | 3 (100)                       | 2 (100)               | 1 (50)               | 1 (50)                             | 0                                         |
| Inflow/MV/TV                         | 0              | 0                                 | 0                             | 0                     | 0                    | 0                                  | 0                                         |
| Outflow/AoV                          | 2 (50)         | 1 (33)                            | 0                             | 0                     | 0                    | 0                                  | 0                                         |
| Left ventricle                       | 0              | 0                                 | 1 (33)                        | 0                     | 0                    | 0                                  | 1 (50)                                    |
| Septum/Crux                          | 0              | 1 (33)                            | 0                             | 0                     | 0                    | 0                                  | 1 (50)                                    |
| Right ventricle                      | 0              | 0                                 | 0                             | 0                     | 0                    | 2 (100)                            | 0                                         |
| Intramyocardial                      | 0              | 1 (33)                            | 0                             | 1 (50)                | 0                    | 0                                  | 1 (50)                                    |
| Epicardial                           | 0              | 1 (33)                            | 0                             | 1 (50)                | 0                    | 2 (100)                            | 0                                         |
| Endocardial                          | 0              | 1 (33)                            | 0                             | 0                     | 0                    | 0                                  | 0                                         |
| Intrapericardial                     | 2 (50)         | 0                                 | 0                             | 0                     | 1 (50)               | 1 (50)                             | 0                                         |
| Anterior mediastinal                 | 0              | 0                                 | 0                             | 0                     | 0                    | 0                                  | 1 (50)                                    |
| Posterior mediastinal                | 1 (25)         | 0                                 | 0                             | 2 (100)               | 0                    | 0                                  | 0                                         |
| <b>Tissue characteristics</b>        |                |                                   |                               |                       |                      |                                    |                                           |
| Cine intensity ratio                 | 3.3 (2.7, 3.8) | 1 (0.7, 1.9)                      | 1.4 (1.1, 1.7)                | 1.2 (0.9, 1.6)        | 2.3 (2.1, 2.5)       | 3 (2, 4)                           | 3.4 (3, 3.8)                              |
| Pre-Gd T1 imaging intensity ratio    | 0.9 (0.8, 1.7) | 0.9 (0.8, 1.5)                    | 1.3 (0.9, 1.4)                | -                     | 1.1                  | 1.7 (1.6, 1.7)                     | 2.1                                       |
| T2 imaging intensity ratio           | 2.2 (2, 3.4)   | 0.9 (0.7, 1.1)                    | 2.1 (1.7, 3.3)                | 2.1                   | 2.2 (2.1, 2.3)       | 3.6 (1.3, 5.9)                     | 3.4                                       |
| Evidence of fat content              | 0/3 (0)        | 0/2 (0)                           | 0/3 (0)                       | 0/1 (0)               | 0/2 (0)              | 0/2 (0)                            | 0/2 (0)                                   |
| First pass perfusion intensity ratio | 0.4 (0.4, 0.4) | 0.7 (0.5, 0.9)                    | 1.3                           | 0.4                   | 2.6 (2.6, 3.2)       | 0.3 (0.3, 0.3)                     | 0.6                                       |
| LGE intensity ratio                  | 0.9 (0.4, 1.4) | 7.7 (1.6, 14)                     | 2.7 (1.3, 14)                 | 0.2                   | 5.3 (4.8, 5.8)       | 1.7 (0.4, 3.1)                     | 4.2 (1.1, 7.3)                            |
| Fibroma LGE pattern                  | 0/2 (0)        | 0/2 (0)                           | 1 (33)                        | 0/1 (0)               | 1/2 (50)             | 0/2 (0)                            | 0/2 (0)                                   |

CMR = cardiovascular magnetic resonance; SVC = superior vena cava; IVC = inferior vena cava; RA = right atrium; LA = left atrium; MV = mitral valve; TV = tricuspid valve; AoV = aortic valve; LGE = late gadolinium enhancement; TSC = tuberous sclerosis complex. **Mass types listed in red were not represented in the previously published diagnostic criteria.** \*Two masses not listed: lipomatous hypertrophy of the atrial wall and **glomus tumor**. †Respiratory symptoms: respiratory distress, cough, tachypnea, abnormal chest radiograph, cyanosis. Neurologic symptoms: seizure, stroke, syncope, presyncope. ‡Angiosarcoma also included in malignant tumors. §Includes **bronchogenic cyst (n=2), foregut duplication cyst (n=1)**, and pericardial cyst (n=1). ||Benign vascular lesion, favor vascular malformation, predominantly venous-capillary type; and vascular (venous and lymphatic) malformation involving thymic lobe.

Supplemental Table 6. Univariate logistic regression by mass type.

| Variable                      | Fibroma | Rhabdomyoma | Malignant | Myxoma | Teratoma | Fatty deposits in TSC | Hemangioma | Thrombus | Angiosarcoma* |
|-------------------------------|---------|-------------|-----------|--------|----------|-----------------------|------------|----------|---------------|
| N                             | 73      | 33          | 30        | 15     | 9        | 6                     | 6          | 5        | 5             |
| Age at CMR                    | ↓       | ↓           | ↑         | ↑      | ↓        |                       |            |          | ↑             |
| Prenatal diagnosis            |         | +           | -         |        | -        |                       |            |          |               |
| History of malignancy         | -       |             | +         |        |          |                       |            |          |               |
| <b>Presenting symptoms</b>    |         |             |           |        |          |                       |            |          |               |
| Respiratory symptoms          |         |             |           |        | +        |                       |            |          |               |
| Neuro symptoms                |         |             |           |        |          |                       |            |          |               |
| Arrhythmia                    | +       |             |           |        |          |                       |            |          |               |
| Fever                         |         |             |           |        |          |                       |            |          |               |
| Heart murmur                  |         |             |           |        |          |                       |            |          |               |
| Chest pain                    |         |             | +         |        |          |                       |            |          | +             |
| Fatigue                       |         |             |           |        |          |                       | +          |          | +             |
| <b>Gross characteristics</b>  |         |             |           |        |          |                       |            |          |               |
| Absolute dimension            | ↑       |             | ↑         | ↓      |          |                       |            |          | ↑             |
| Mass-to-length ratio          | ↑       |             |           | ↓      | ↑        |                       |            |          |               |
| Multiple                      | -       | +           | +         |        |          | +                     |            |          |               |
| Well-circumscribed            | +       |             | -         |        |          |                       |            |          | -             |
| Infiltrative                  | -       |             | +         |        |          |                       |            |          | +             |
| Pericardial effusion          |         |             |           |        | +        |                       |            |          |               |
| Pleural effusion              | -       |             | +         |        | +        |                       |            |          | +             |
| Hemodynamic impact            |         |             |           |        | +        |                       |            |          |               |
| <b>Location</b>               |         |             |           |        |          |                       |            |          |               |
| SVC/IVC                       |         |             | +         |        |          |                       |            | +        |               |
| RA/LA/Atrial septum           | -       |             | +         |        |          |                       |            |          | +             |
| Inflow/MV/TV                  | -       |             |           |        |          |                       | +          |          |               |
| Outflow/AoV                   |         | +           |           |        |          |                       |            |          |               |
| LV                            | +       |             | -         |        |          |                       |            |          |               |
| Septum/Crux                   | +       |             |           |        |          | +                     |            |          |               |
| RV                            |         |             |           |        |          |                       |            |          |               |
| Intramyocardial               | +       |             | -         | -      | -        |                       |            |          |               |
| Epicardial                    | -       | +           | +         |        |          | +                     |            |          | +             |
| Endocardial                   | -       |             |           | +      |          |                       | +          | +        |               |
| Intrapericardial              | -       |             | +         |        | +        |                       |            |          |               |
| Anterior mediastinal          |         |             | +         |        |          |                       |            |          | +             |
| Posterior mediastinal         |         |             | +         |        |          |                       |            |          |               |
| <b>Tissue characteristics</b> |         |             |           |        |          |                       |            |          |               |
| Cine intensity ratio          | ↓       | ↓           |           | ↑      | ↑        |                       |            |          |               |
| Pre-Gd T1 intensity ratio     | ↓       |             |           |        |          |                       |            |          |               |
| T2 intensity ratio            | ↓       |             | ↑         |        |          |                       | ↑          |          |               |
| Fat content                   |         |             |           |        |          | +                     |            |          |               |
| FPP intensity ratio           | ↓       |             |           |        |          |                       | ↑          |          | ↑             |
| LGE intensity ratio           | ↑       | ↓           |           |        |          |                       |            |          |               |
| Fibroma LGE pattern           | +       | -           |           |        |          |                       |            |          |               |

↓ indicates a low value, - indicates a negative association, ↑ indicates a high value, and + indicates a positive association.

↓, ↑, +, or - indicates p < 0.05.

↓, ↑, +, or - indicates p < 0.01.

TSC = tuberous sclerosis complex. \*Angiosarcoma is also included in the category 'Malignant'.



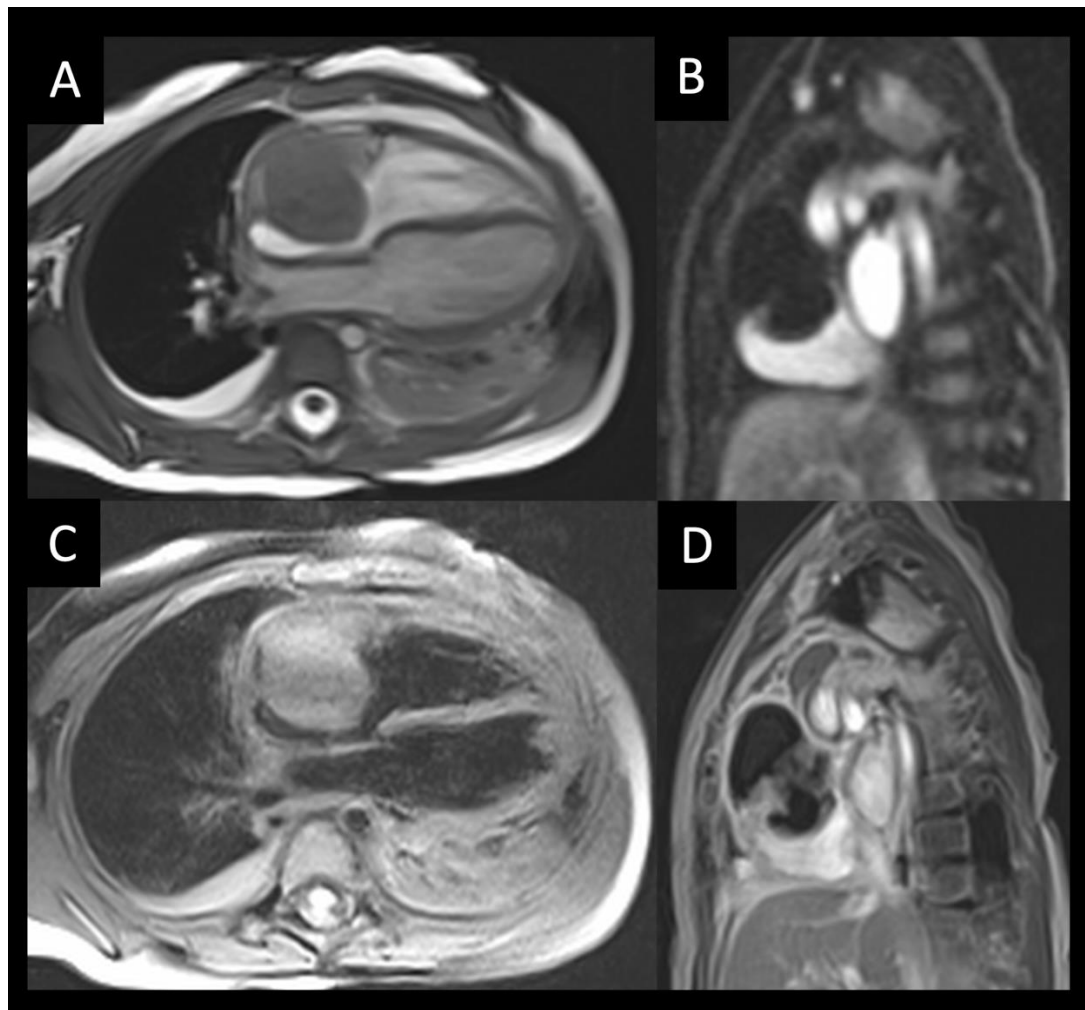

Supplemental Figure 1. Right atrial fibroma, with incorrect selection of 'malignant' as a differential diagnosis by Reviewer 1. This 18 month old girl presented with fatigue, pericardial effusion, abnormal chest radiograph, and respiratory symptoms. A large mass is seen in the right atrium by cine SSFP imaging (A). On first pass perfusion imaging, the mass does not enhance (B). The mass is isointense on T1 weighted imaging (C), and the mass has patchy regions of enhancement on LGE imaging (D). A right pleural effusion is also seen on axial images (A, C). The location and LGE appearance are atypical for fibroma.

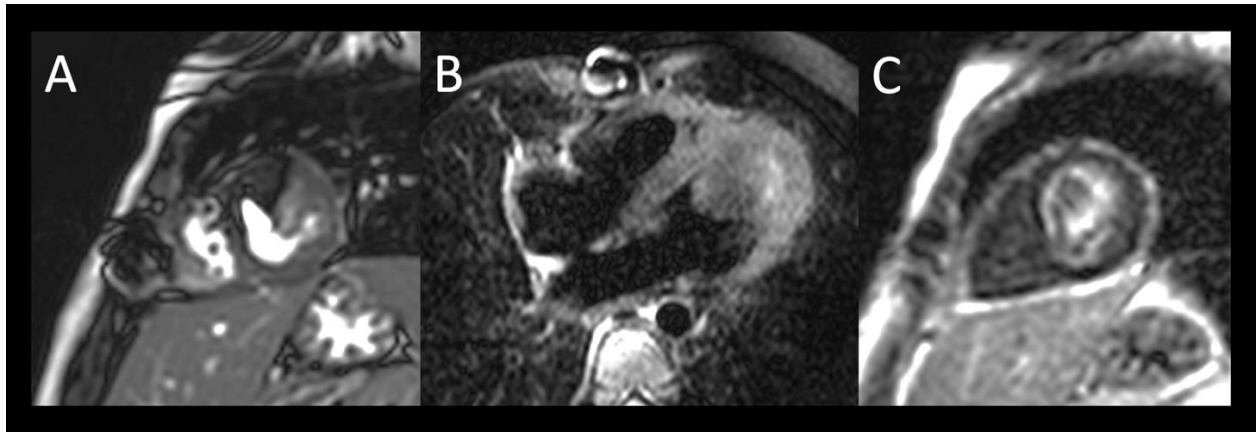

Supplemental Figure 2. Left ventricular rhabdomyoma, with incorrect selection of 'malignant' as a differential diagnosis by Reviewer 2. Metallic susceptibility artifact obscures a portion of the mass on cine SSFP imaging (A). The mass is intracavitary with low signal intensity on T1 weighted imaging with fat suppression (B), and the mass has rim enhancement on LGE imaging, that is atypical for rhabdomyoma (C).

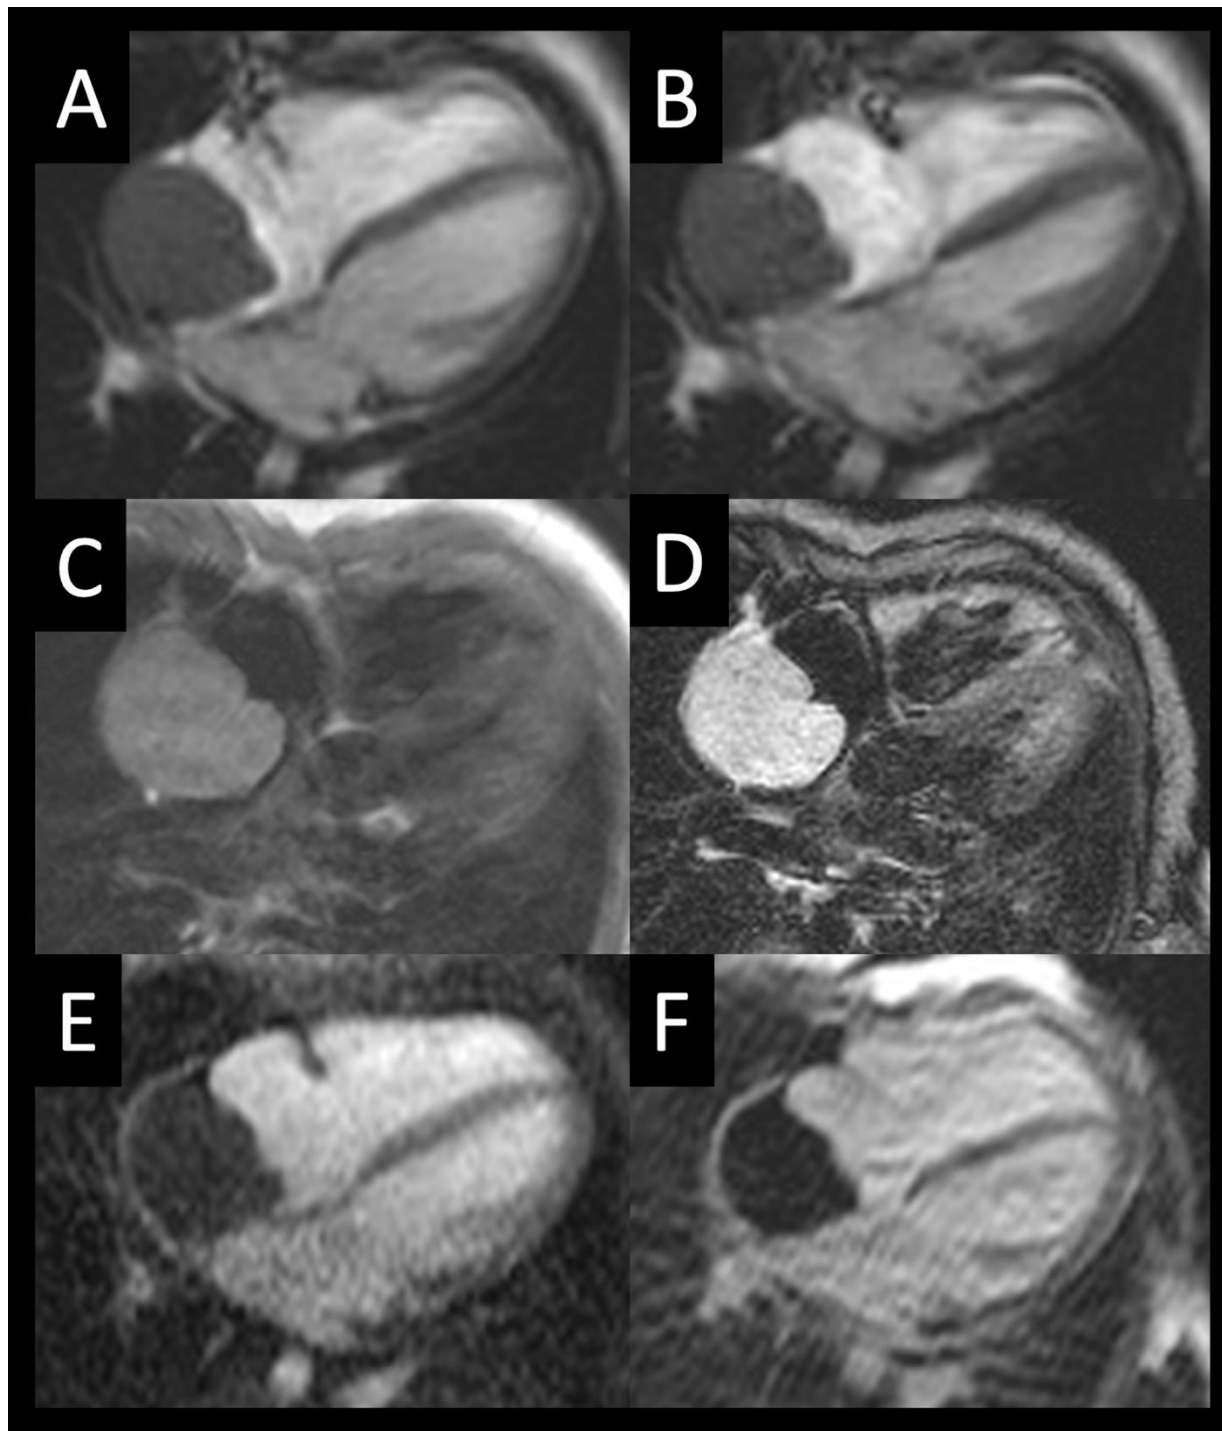

Supplemental Figure 3. Right atrial rhabdomyoma, with incorrect selection of ‘malignant’ as a differential diagnosis by Reviewer 2. This 2.5 year old girl initially presented with supraventricular tachycardia. The mass appeared to protrude from the right atrium into the pericardial space on cine SSFP imaging in diastole (A) and systole (B). The mass was hyperintense on T1 weighted imaging (C) and T2 weighted imaging with fat suppression (D). The mass did not enhance on first pass perfusion imaging (E) or LGE imaging (F). Although the mass has some atypical features (large size beyond infancy, and solitary mass), the tissue characteristics are consistent with rhabdomyoma.

**Table 3.** CMR-based diagnostic criteria of cardiac masses in children.

|                                  | Fibroma                                                                                                                                                                                                                      | Rhabdomyoma                                                                                                                                                                   | Malignant                                                                                                                                                                                                                                             | Myxoma                                                                                                                                                                                                                      | Teratoma                                                                                                                                                                                                   | Fatty deposits in TSC§                                                                                                                              | Thrombus                                                                                                                                                    | Infectious/inflammatory                                                                                                                                                                                       | IMT                                                                                                                                                                                                                          | Rosai Dorfman                                                                                                                              | Papillary fibroelastoma                                                                                                                       | Benign myofibroblastic mass                                                                 | Neuro-fibroma                                                                                                                            | Lipoma                                                                                                                                                                                 | Cyst                                                                                                                                    | Paraganglioma                                                                                                                                                                                                          | Hemangioma                                                                                                                                                                          | Angiosarcoma                                                                                                                                                                                                                                                          | Hemangio-endothelioma                                                                                                                                                                                                                                                                                                                                                                  | Vascular malformation                                                                                                                                                                                                                                          | Glomus tumor                                                                                                                                                                                                                                                                                                  |
|----------------------------------|------------------------------------------------------------------------------------------------------------------------------------------------------------------------------------------------------------------------------|-------------------------------------------------------------------------------------------------------------------------------------------------------------------------------|-------------------------------------------------------------------------------------------------------------------------------------------------------------------------------------------------------------------------------------------------------|-----------------------------------------------------------------------------------------------------------------------------------------------------------------------------------------------------------------------------|------------------------------------------------------------------------------------------------------------------------------------------------------------------------------------------------------------|-----------------------------------------------------------------------------------------------------------------------------------------------------|-------------------------------------------------------------------------------------------------------------------------------------------------------------|---------------------------------------------------------------------------------------------------------------------------------------------------------------------------------------------------------------|------------------------------------------------------------------------------------------------------------------------------------------------------------------------------------------------------------------------------|--------------------------------------------------------------------------------------------------------------------------------------------|-----------------------------------------------------------------------------------------------------------------------------------------------|---------------------------------------------------------------------------------------------|------------------------------------------------------------------------------------------------------------------------------------------|----------------------------------------------------------------------------------------------------------------------------------------------------------------------------------------|-----------------------------------------------------------------------------------------------------------------------------------------|------------------------------------------------------------------------------------------------------------------------------------------------------------------------------------------------------------------------|-------------------------------------------------------------------------------------------------------------------------------------------------------------------------------------|-----------------------------------------------------------------------------------------------------------------------------------------------------------------------------------------------------------------------------------------------------------------------|----------------------------------------------------------------------------------------------------------------------------------------------------------------------------------------------------------------------------------------------------------------------------------------------------------------------------------------------------------------------------------------|----------------------------------------------------------------------------------------------------------------------------------------------------------------------------------------------------------------------------------------------------------------|---------------------------------------------------------------------------------------------------------------------------------------------------------------------------------------------------------------------------------------------------------------------------------------------------------------|
| <b>Classification</b>            | Fibroblastic                                                                                                                                                                                                                 | Muscular                                                                                                                                                                      | Various                                                                                                                                                                                                                                               | Endocardial                                                                                                                                                                                                                 | Ectopic tissue                                                                                                                                                                                             | Lipomatous                                                                                                                                          | Other                                                                                                                                                       | Infectious/inflammatory                                                                                                                                                                                       | Endocardial                                                                                                                                                                                                                  | Histiocytic                                                                                                                                | Endocardial                                                                                                                                   | Fibroblastic                                                                                | Peripheral nerve sheath                                                                                                                  | Lipomatous                                                                                                                                                                             | Malformation/ectopic tissue                                                                                                             | Neuroendocrine                                                                                                                                                                                                         | Vascular anomaly                                                                                                                                                                    | Vascular anomaly                                                                                                                                                                                                                                                      | Vascular anomaly                                                                                                                                                                                                                                                                                                                                                                       | Vascular anomaly                                                                                                                                                                                                                                               | Vascular anomaly                                                                                                                                                                                                                                                                                              |
| <b>Size</b>                      | 2-10 cm                                                                                                                                                                                                                      | <1-8 cm                                                                                                                                                                       | 1-10 cm                                                                                                                                                                                                                                               | <1-9 cm*                                                                                                                                                                                                                    | 3-7 cm                                                                                                                                                                                                     | <1-5 cm                                                                                                                                             | 1-2 cm                                                                                                                                                      | 1-3 cm                                                                                                                                                                                                        | <1-6 cm                                                                                                                                                                                                                      | 3-5 cm                                                                                                                                     | <1-2 cm                                                                                                                                       | 1-2 cm                                                                                      | 5-8 cm                                                                                                                                   | 1-5 cm                                                                                                                                                                                 | 1-5 cm                                                                                                                                  | 3-4 cm                                                                                                                                                                                                                 | 1-5 cm                                                                                                                                                                              | 6-9 cm                                                                                                                                                                                                                                                                | 3-6 cm                                                                                                                                                                                                                                                                                                                                                                                 | 5-10 cm                                                                                                                                                                                                                                                        | <1-10 cm                                                                                                                                                                                                                                                                                                      |
| <b>Location &amp; appearance</b> | <ul style="list-style-type: none"> <li>Intra-myocardial</li> <li>Well circumscribed</li> <li>Solitary ± lobules</li> <li>Septum, free wall, or both</li> <li>LV &gt;&gt; RV (can be atrium)</li> </ul>                       | <ul style="list-style-type: none"> <li>Intracavitary</li> <li>Attached to LV or RV muscle</li> <li>Can be atrium or epicardial</li> <li>Usually multiple†</li> </ul>          | <ul style="list-style-type: none"> <li>Commonly SVC/IVC/RA</li> <li>Epicardial, intrapericardial, anterior/posterior mediastinal</li> <li>Infiltrative‡</li> <li>May cross tissue plane</li> </ul>                                                    | <ul style="list-style-type: none"> <li>Typically left atrium but can be any chamber*</li> <li>Endocardial, pedunculated, mobile, heterogeneous</li> <li>Mimics other masses: variable locations &amp; appearance</li> </ul> | <ul style="list-style-type: none"> <li>Usually intrapericardial, compresses SVC/RA</li> <li>Multilobular, bosselated, solid &amp; cystic areas</li> <li>May be intramyocardial or intracavitary</li> </ul> | <ul style="list-style-type: none"> <li>Intra-myocardial</li> <li>Commonly ventricular septum</li> <li>Epicardial</li> <li>Often multiple</li> </ul> | <ul style="list-style-type: none"> <li>Intracavitary</li> <li>SVC/IVC</li> <li>Endocardial</li> <li>Often in regions of stasis (lines, infarcts)</li> </ul> | <ul style="list-style-type: none"> <li>Variable locations</li> <li>Endocardial or intra-myocardial</li> </ul>                                                                                                 | <ul style="list-style-type: none"> <li>Usually endocardial &amp; intracavitary</li> <li>Can be intramyocardial or intrapericardial</li> <li>RA/RV more common</li> <li>Often polypoid, broad-based</li> </ul>                | <ul style="list-style-type: none"> <li>Variable</li> </ul>                                                                                 | <ul style="list-style-type: none"> <li>Endocardial</li> <li>Valve (usually mitral or aortic)</li> <li>Pedunculated</li> <li>Mobile</li> </ul> | <ul style="list-style-type: none"> <li>Outflow tract</li> <li>Well circumscribed</li> </ul> | <ul style="list-style-type: none"> <li>Posterior mediastinal</li> <li>Multiple</li> </ul>                                                | <ul style="list-style-type: none"> <li>Any location</li> <li>Commonly intramyocardial or endocardial</li> <li>May be valvular, pedunculated, mobile</li> </ul>                         | <ul style="list-style-type: none"> <li>Pericardium</li> <li>Posterior mediastinum (bronchogenic or foregut duplication cyst)</li> </ul> | <ul style="list-style-type: none"> <li>Intrapericardial, sympathetic chain</li> <li>Blood supply from coronary circulation</li> <li>Multiple vascular channels</li> <li>Encapsulated, well-circumscribed</li> </ul>    | <ul style="list-style-type: none"> <li>Any location, commonly RA during infancy</li> <li>Commonly inflow tracts</li> <li>Commonly endocardial</li> <li>Vascular channels</li> </ul> | <ul style="list-style-type: none"> <li>Right atrium</li> <li>Infiltrative</li> <li>Extends to epicardium and anterior mediastinum</li> <li>Rapid growth</li> </ul>                                                                                                    | <ul style="list-style-type: none"> <li>Right atrium</li> <li>Left atrium</li> <li>Occasionally ventricle</li> <li>May be infiltrative with pericardial or mediastinal extension</li> </ul>                                                                                                                                                                                             | <ul style="list-style-type: none"> <li>Solitary</li> <li>Well circumscribed</li> <li>Intramyocardial or epicardial</li> <li>Heterogenous</li> <li>Lymphatic malformation is commonly in RA, encasing a coronary artery</li> </ul>                              | <ul style="list-style-type: none"> <li>Solitary or multiple intramyocardial masses</li> </ul>                                                                                                                                                                                                                 |
| <b>Cine SSFP</b>                 | --                                                                                                                                                                                                                           | --                                                                                                                                                                            | ±                                                                                                                                                                                                                                                     | ++                                                                                                                                                                                                                          | +                                                                                                                                                                                                          | ±<br>(Rim of chemical shift artifact)                                                                                                               | ±                                                                                                                                                           | +                                                                                                                                                                                                             | +                                                                                                                                                                                                                            | ±                                                                                                                                          | +                                                                                                                                             | +                                                                                           | ±                                                                                                                                        | --                                                                                                                                                                                     | +                                                                                                                                       | +                                                                                                                                                                                                                      | +                                                                                                                                                                                   | +                                                                                                                                                                                                                                                                     | ±                                                                                                                                                                                                                                                                                                                                                                                      | +                                                                                                                                                                                                                                                              | +                                                                                                                                                                                                                                                                                                             |
| <b>T1</b>                        | --                                                                                                                                                                                                                           | --                                                                                                                                                                            | ±                                                                                                                                                                                                                                                     | ±                                                                                                                                                                                                                           | --                                                                                                                                                                                                         | +                                                                                                                                                   | --                                                                                                                                                          | --                                                                                                                                                                                                            | ±                                                                                                                                                                                                                            | ±                                                                                                                                          | --                                                                                                                                            | --                                                                                          | +                                                                                                                                        | +                                                                                                                                                                                      | ±                                                                                                                                       | --                                                                                                                                                                                                                     | ±                                                                                                                                                                                   | +                                                                                                                                                                                                                                                                     | ±                                                                                                                                                                                                                                                                                                                                                                                      | +                                                                                                                                                                                                                                                              | +                                                                                                                                                                                                                                                                                                             |
| <b>T2</b>                        | ±<br>(Heterogeneous)                                                                                                                                                                                                         | ±                                                                                                                                                                             | +                                                                                                                                                                                                                                                     | +                                                                                                                                                                                                                           | +                                                                                                                                                                                                          | --<br>(T2/FS)                                                                                                                                       | --                                                                                                                                                          | +                                                                                                                                                                                                             | ±                                                                                                                                                                                                                            | ±                                                                                                                                          | ±                                                                                                                                             | +                                                                                           | +                                                                                                                                        | --<br>(T2/FS)                                                                                                                                                                          | ++                                                                                                                                      | +                                                                                                                                                                                                                      | +                                                                                                                                                                                   | +                                                                                                                                                                                                                                                                     | +                                                                                                                                                                                                                                                                                                                                                                                      | +                                                                                                                                                                                                                                                              | +                                                                                                                                                                                                                                                                                                             |
| <b>Fat suppression</b>           | No                                                                                                                                                                                                                           | No                                                                                                                                                                            | No                                                                                                                                                                                                                                                    | No                                                                                                                                                                                                                          | No                                                                                                                                                                                                         | Yes                                                                                                                                                 | No                                                                                                                                                          | No                                                                                                                                                                                                            | No                                                                                                                                                                                                                           | No                                                                                                                                         | No                                                                                                                                            | No                                                                                          | No                                                                                                                                       | Yes                                                                                                                                                                                    | No                                                                                                                                      | No                                                                                                                                                                                                                     | No                                                                                                                                                                                  | No                                                                                                                                                                                                                                                                    | No                                                                                                                                                                                                                                                                                                                                                                                     | No                                                                                                                                                                                                                                                             | --                                                                                                                                                                                                                                                                                                            |
| <b>FPP</b>                       | --                                                                                                                                                                                                                           | --                                                                                                                                                                            | ±                                                                                                                                                                                                                                                     | --                                                                                                                                                                                                                          | --                                                                                                                                                                                                         | --                                                                                                                                                  | --                                                                                                                                                          | --                                                                                                                                                                                                            | --                                                                                                                                                                                                                           | --                                                                                                                                         | ±                                                                                                                                             | --                                                                                          | --                                                                                                                                       | --                                                                                                                                                                                     | --                                                                                                                                      | +++                                                                                                                                                                                                                    | ++                                                                                                                                                                                  | ++                                                                                                                                                                                                                                                                    | ±                                                                                                                                                                                                                                                                                                                                                                                      | ±                                                                                                                                                                                                                                                              | ++                                                                                                                                                                                                                                                                                                            |
| <b>LGE</b>                       | +++<br>(Fibroma LGE pattern)                                                                                                                                                                                                 | --                                                                                                                                                                            | ±                                                                                                                                                                                                                                                     | ±                                                                                                                                                                                                                           | ±                                                                                                                                                                                                          | --                                                                                                                                                  | ±                                                                                                                                                           | ++                                                                                                                                                                                                            | ±<br>(sometimes ++)                                                                                                                                                                                                          | ++                                                                                                                                         | +                                                                                                                                             | ±                                                                                           | --                                                                                                                                       | --                                                                                                                                                                                     | --                                                                                                                                      | ++<br>(Peripheral enhancement)                                                                                                                                                                                         | ++                                                                                                                                                                                  | +                                                                                                                                                                                                                                                                     | ±                                                                                                                                                                                                                                                                                                                                                                                      | ±                                                                                                                                                                                                                                                              | ++                                                                                                                                                                                                                                                                                                            |
| <b>Pericardial effusion</b>      | Common                                                                                                                                                                                                                       | Uncommon                                                                                                                                                                      | Common                                                                                                                                                                                                                                                | Uncommon                                                                                                                                                                                                                    | Common                                                                                                                                                                                                     | No                                                                                                                                                  | Uncommon                                                                                                                                                    | Common                                                                                                                                                                                                        | Uncommon<br>Infants                                                                                                                                                                                                          | Common                                                                                                                                     | Uncommon                                                                                                                                      | Uncommon                                                                                    | Uncommon                                                                                                                                 | Uncommon                                                                                                                                                                               | Common                                                                                                                                  | Uncommon                                                                                                                                                                                                               | Infants                                                                                                                                                                             | Common                                                                                                                                                                                                                                                                | Infants                                                                                                                                                                                                                                                                                                                                                                                | Common                                                                                                                                                                                                                                                         | Common                                                                                                                                                                                                                                                                                                        |
| <b>Other</b>                     | <ul style="list-style-type: none"> <li>Usually dx prenatally or in infancy</li> <li>Ventricular arrhythmia</li> <li>Microscopic calcifications &amp; regions of necrosis</li> <li>Gorlin syndrome (15% CMR cases)</li> </ul> | <ul style="list-style-type: none"> <li>Usually dx prenatally or in infancy</li> <li>Tuberous sclerosis (&gt;80% cases)</li> <li>Atrial and ventricular arrhythmias</li> </ul> | <ul style="list-style-type: none"> <li>Pleural effusion</li> <li>Usually older children</li> <li>History of malignancy</li> <li>Chest pain</li> <li>Multiple</li> <li>High mortality</li> <li>Metabolic activity on <sup>18</sup>F-FDG-PET</li> </ul> | <ul style="list-style-type: none"> <li>Usually older children</li> <li>↑prevalence in females</li> <li>Triad of symptoms: (obstructive, constitutional, systemic emboli)</li> <li>Carney complex (30% CMR cases)</li> </ul> | <ul style="list-style-type: none"> <li>Usually dx prenatally or in infancy</li> <li>Pericardial/pleural effusion</li> <li>Respiratory symptoms</li> </ul>                                                  | <ul style="list-style-type: none"> <li>Older children with tuberous sclerosis</li> </ul>                                                            | <ul style="list-style-type: none"> <li>Dark on T1 scout imaging</li> <li>Dark on LGE sequence, long inversion time</li> </ul>                               | <ul style="list-style-type: none"> <li>Fever</li> <li>Anemia</li> <li>Thrombocytopenia</li> <li>Chest pain</li> <li>Inflammatory pseudotumor</li> <li>Metabolic activity on <sup>18</sup>F-FDG-PET</li> </ul> | <ul style="list-style-type: none"> <li>ALK gene expression</li> <li>May be locally aggressive with recurrence and metastasis</li> <li>Heart murmur, fatigue</li> <li>Metabolic activity on <sup>18</sup>F-FDG-PET</li> </ul> | <ul style="list-style-type: none"> <li>Neuro symptoms</li> <li>Chest pain</li> <li>Metabolic activity on <sup>18</sup>F-FDG-PET</li> </ul> | <ul style="list-style-type: none"> <li>Murmur</li> <li>Embolic events</li> </ul>                                                              | <ul style="list-style-type: none"> <li>Hemodynamic impact</li> </ul>                        | <ul style="list-style-type: none"> <li>Older children</li> <li>Neuro-fibromatosis</li> <li>At risk for malignant degeneration</li> </ul> | <ul style="list-style-type: none"> <li>Range of clinical presentations, usually benign but may cause syncope or sudden death depending on location and risk of embolization</li> </ul> | <ul style="list-style-type: none"> <li>Pericardial cysts may increase in size on repeat imaging</li> </ul>                              | <ul style="list-style-type: none"> <li>Catecholamine excess: arrhythmia, hypertension</li> <li>Teenagers/young adults</li> <li>Succinate dehydrogenase subunit B mutation associated with malignant disease</li> </ul> | <ul style="list-style-type: none"> <li>Often incidental diagnosis</li> <li>Fatigue</li> <li>Fetal or neonatal presentation: pericardial effusion and tamponade</li> </ul>           | <ul style="list-style-type: none"> <li>Malignant</li> <li>Metastatic</li> <li>Older children</li> <li>Chest pain</li> <li>Fatigue</li> <li>Dyspnea</li> <li>Pleural effusion</li> <li>High mortality</li> <li>Metabolic activity on <sup>18</sup>F-FDG-PET</li> </ul> | <ul style="list-style-type: none"> <li>Range of behavior with malignant potential including metastasis (epithelioid subtype)</li> <li>Fetal or neonatal presentation: pericardial effusion</li> <li>Kasabach Merritt phenomenon (consumptive coagulopathy) in Kaposiform subtype</li> <li>Metabolic activity on <sup>18</sup>F-FDG-PET (described in non-cardiac locations)</li> </ul> | <ul style="list-style-type: none"> <li>May have arterial, capillary, venous and/or lymphatic components</li> <li>Resection may not be possible or may risk injury to cardiac structures</li> <li>Often respiratory symptoms, sometimes asymptomatic</li> </ul> | <ul style="list-style-type: none"> <li>Resection may not be possible or may risk injury to cardiac structures</li> <li>Usually found in the subungual regions of fingers and distal extremities (rare cardiac involvement).</li> <li>Usually benign, may be metastatic or have malignant potential</li> </ul> |
| <b>Differential diagnosis</b>    | <ul style="list-style-type: none"> <li>Myofibroma</li> </ul>                                                                                                                                                                 | <ul style="list-style-type: none"> <li>Thrombus</li> </ul>                                                                                                                    | <ul style="list-style-type: none"> <li>Various</li> </ul>                                                                                                                                                                                             | <ul style="list-style-type: none"> <li>Fibroelastoma</li> <li>Malignant</li> </ul>                                                                                                                                          | <ul style="list-style-type: none"> <li>Hemangioma</li> <li>Pericardial cyst</li> </ul>                                                                                                                     | <ul style="list-style-type: none"> <li>Lipoma</li> </ul>                                                                                            | <ul style="list-style-type: none"> <li>Rhabdomyoma</li> </ul>                                                                                               | <ul style="list-style-type: none"> <li>Endocarditis</li> <li>IMT</li> <li>Papillary fibroelastoma</li> </ul>                                                                                                  | <ul style="list-style-type: none"> <li>Low grade sarcoma</li> <li>Myxoma</li> <li>Papillary fibroelastoma</li> <li>Inflammatory pseudotumor</li> </ul>                                                                       | <ul style="list-style-type: none"> <li>Infectious/inflammatory</li> </ul>                                                                  | <ul style="list-style-type: none"> <li>Infectious/inflammatory</li> <li>Myxoma</li> </ul>                                                     | <ul style="list-style-type: none"> <li>Papillary fibroelastoma</li> </ul>                   | <ul style="list-style-type: none"> <li>Malignant</li> </ul>                                                                              | <ul style="list-style-type: none"> <li>Lipomatous hypertrophy of the atrial septum</li> <li>Fatty deposits in TSC</li> </ul>                                                           | <ul style="list-style-type: none"> <li>Hydatid cyst</li> <li>Teratoma</li> <li>Lymphatic malformation</li> </ul>                        | <ul style="list-style-type: none"> <li>Vascular anomalies</li> </ul>                                                                                                                                                   | <ul style="list-style-type: none"> <li>Teratoma (infants)</li> <li>Angio-sarcoma</li> <li>Hemangio-endothelioma</li> <li>Paraganglioma</li> </ul>                                   | <ul style="list-style-type: none"> <li>Hemangio-endothelioma</li> <li>Other malignancy</li> </ul>                                                                                                                                                                     | <ul style="list-style-type: none"> <li>Myxoma</li> <li>Hemangioma</li> <li>Angiosarcoma</li> </ul>                                                                                                                                                                                                                                                                                     | <ul style="list-style-type: none"> <li>Pericardial cyst</li> <li>Teratoma</li> </ul>                                                                                                                                                                           | <ul style="list-style-type: none"> <li>Hemangioma</li> <li>Hemangio-endothelioma</li> </ul>                                                                                                                                                                                                                   |

-- = iso or hypointense, ± = variable intensity, + = hyperintense, ++ = strongly hyperintense. LV = left ventricle, RV = right ventricle, SVC = superior vena cava, RA = right atrium, SSFP = steady state free precession, FPP = first pass perfusion, LGE = late gadolinium enhancement, TSC = tuberous sclerosis complex, IMT = inflammatory myofibroblastic tumor, T2/FS = T2-weighted imaging with fat suppression, <sup>18</sup>F-FDG-PET = <sup>18</sup>F-fluorodeoxyglucose positron emission tomography. \*Myxomas referred for CMR are typically smaller than average and less likely to be located in the left atrium (referral bias). †Rhabdomyomas referred for CMR are commonly solitary (referral bias). ‡Infiltrative: (1) Poorly defined edges, (2) infiltrating myocardium or crossing a tissue plane within the heart, (3) involving both cardiac and extracardiac structures, or (4) appearance of linear growth through a large vessel such as the superior or inferior vena cava. §Also known as myocardial fatty foci.
